# Supplementary material for: DNA Barcoding Identifies Endangered Sharks in Pet Food Sold in Singapore
Source: Frontiers journal article supplement (doi:10.3389/fmars.2022.836941), 2022-03-04
Supplement: Table_1.docx [file Table_1.docx]

SI Table 1, Details of the brand, description of contents, type of food, number of samples taken from tin and the IDs of any Shark DNA found. N/A indicates a sample that could not be identified. * indicates this species was found tice in the same can. All were marketed as cat food.

| **Brand** | **Product description** | **Type** | **Number of samples taken** | **Shark IDs** |
| --- | --- | --- | --- | --- |
| Sheba | Tuna and White Fish in Gravy | Wet | 2 | *Rhizoprionodon oligolinx, Carcharhinus sorrah* |
| Fancy Feast | Tender Ocean Whitefish Feast: Kitten | Wet | 2 | *Carcharhinus sorrah, Carcharhinus falciformis* |
| Cesar | White Fish with Vegetables | Wet | 2 | N/A, N/A |
| Sheba | Tuna and Salmon in Gravy | Wet | 2 | N/A, *Carcharhinus sorrah* |
| Snappy Tom | Whitemeat Tuna with Flaked Salmon | Wet | 4 | N/A, N/A, N/A, *Rhizoprionodon porosus* |
| aristo-cats | Premium Plus Tuna with Smoked Fish | Wet | 3 | N/A, N/A, N/A |
| Gourmet Delight | Whitemeat Chicken, Whitefish and Tuna Liver | Wet | 4 | N/A, N/A, N/A, N/A |
| Angel | Ocean Whitefish and Tuna | Wet | 2 | N/A, N/A |
| Purina | Beachside Crunch: With Ocean Whitefish and Flavors of Shrimp, Crab and Tuna | Dry | 3 | N/A, N/A, N/A |
| Jollycat | Fresh White Meat Tuna and Anchovy in Gravy | Wet | 3 | N/A, N/A, N/A |
| Fancy Feast | Ocean Whitefish & Tuna Feast in Sauteed Seafood Flavor Gravy | Wet | 3 | *Carcharias taurus*, N/A, N/A |
| Whiskas | Ocean Fish | Wet | 5 | N/A, N/A, N/A, N/A, *Hemigaleus microstoma* |
| Monge Jelly | Yellowfin Tuna and Whitebait | Wet | 3 | *Carcharhinus spp*., N/A, N/A |
| Fancy Feast | Tender Ocean Whitefish Feast: Kitten | Wet | 2 | N/A, *Loxodon macrorhinus* |
| Fancy Feast | Ocean Whitefish & Tuna Feast: Classic Pate | Wet | 3 | N/A, *Carcharhinus falciformi*s, N/A |
| Fancy Feast | Seafood Feast: Classic Pate | Wet | 3 | N/A, *Prionace glauca, Prionace glauca** |
| Snappy Tom | Whitemeat Tuna with Flaked Salmon | Wet | 5 | *Prionace glauca*, N/A, N/A, N/A, *Carcharhinus spp*. |
| Sheba | Tuna and White Fish in Gravy | Wet | 4 | *Carcharhinus falciformis*, N/A, N/A, N/A |
| Angel | Ocean Whitefish and Tuna | Wet | 2 | N/A, N/A |
| aristo-cats | Tuna with Smoked Fish | Wet | 4 | N/A, *Carcharhinus spp*., N/A, N/A |
| NuTripe | Ocean Fish and Green Tripe | Wet | 3 | N/A, N/A, *Prionace glauca* |
| Whiskas | Seafood Platter | Wet | 5 | N/A, *Carcharhinus spp*., N/A, N/A, N/A |
| Fancy Feast | Ocean Whitefish and Tuna Feast in Sauteed Seafood Flavor Gravy | Wet | 3 | N/A, N/A, N/A |
| Aixia Yaizu | Tuna and Chicken with Whitebait | Wet | 3 | *Carcharhinus spp*., N/A, N/A |
| Angel | Indoor Nutrition Salmon Cat Food |  | 3 | N/A, N/A, N/A |
| Kit Cat | Kitten and Pregnant Cat: Complete Premium Cat Food | Wet | 2 | *Triaenodon obesus*, N/A |
| Aixia Miaw Miaw | Tuna with Whitebait | Wet | 4 | N/A, N/A, N/A, N/A |
| Whiskas | Mackerel and Sardines | Wet | 4 | *Carcharhinus falciformis, Loxodon macrorhinus, Carcharias taurus*, N/A |
| Kit Cat | Tuna and Whitebait | Wet | 3 | *Carcharhinus spp., Carcharhinus spp*.*, N/A |
| Fancy Feast | Broth: Creamy, with Tuna, Chicken and Whitefish in a Decadent Creamy Broth | Broth | 3 | *Carcharhinus spp., Hemigaleus microstoma, Carcharhinus spp.** |
| Sheba | Tuna and White Fish in Gravy | Wet | 4 | *Carcharhinus spp., Prionace glauca, Prionace glauca**, N/A |
| Kit Cat | Wild Caught Tuna and Whitebait | Wet | 3 | N/A, *Prionace glauca, Triaenodon obesus* |
| Fancy Feast | Broth: Classic, with Tuna, Anchovies, and Whitefish in a Decadent Silky Broth | Broth | 3 | *Prionace glauca*, N/A, *Carcharhinus spp.* |
| Friskies | Salmon Dinner Pate | Wet | 3 | N/A, N/A, N/A |
| Fancy Feast | Savory Salmon Feast: Classic Pate | Wet | 2 | *Triaenodon obesus, Prionace glauca* |
| Sheba | Tuna with Prawn in Jelly | Wet | 4 | N/A, N/A, N/A, *Carcharhinus spp.* |
| Whiskas | Tuna and Whitefish Flavored Broth | Broth | 3 | N/A, *Carcharhinus spp*., N/A |
| Fancy Feast | Inspirations with Tuna Courgette and Wholegrain Rice | Wet | 3 | N/A, *Carcharhinus spp*., N/A |
| Cesar | Whitefish with Vegetables | Wet | 3 | N/A, N/A, N/A |
| Sheba | Tuna with Shredded Crab | Wet | 4 | N/A, N/A, N/A, *Carcharhinus spp*. |
| Whiskas | Broth with Ocean Fish | Broth | 4 | N/A, N/A, N/A, N/A |
| Fancy Feast | Ocean Whitefish and Tuna Feast: Classic Pate | Wet | 3 | N/A, *Triaenodon obesus, Carcharhinus spp.* |
| Sheba | Tuna and Whitefish in Gravy | Wet | 4 | C*archarhinus spp., Carcharhinus spp.**, N/A, *Loxodon macrorhinus* |
| Sheba | Tuna and Salmon in Gravy | Wet | 3 | *Rhizoprionodon porosus*, N/A, N/A |
| Sheba | Tuna Fillet in Jelly | Wet | 4 | *Carcharhinus spp*., N/A, N/A, *Carcharhinus spp*.* |
